# Supplementary material for: A coronene diimide based radical anion for detection of picomolar H2O2: a biochemical assay for detection of picomolar glucose in aqueous medium
Source: Royal Society of Chemistry journal article supplement (doi:10.1039/d3tb02473c), 2023-12-21
Supplement: d3tb02473c1.pdf [file d3tb02473c1.pdf]

## A coronene diimide based radical anion for detection of picomolar H<sub>2</sub>O<sub>2</sub>: a biochemical assay for detection of picomolar glucose in aqueous medium

Navdeep Kaur<sup>a</sup> and Prabhpreet Singh<sup>\*a</sup>

Department of Chemistry, UGC Centre for Advanced Studies-II, Guru Nanak Dev University, Amritsar 143001 (pb.)-India

E-mail: [prabhpreet.chem@gndu.ac.in](mailto:prabhpreet.chem@gndu.ac.in); M: +91 8427101534

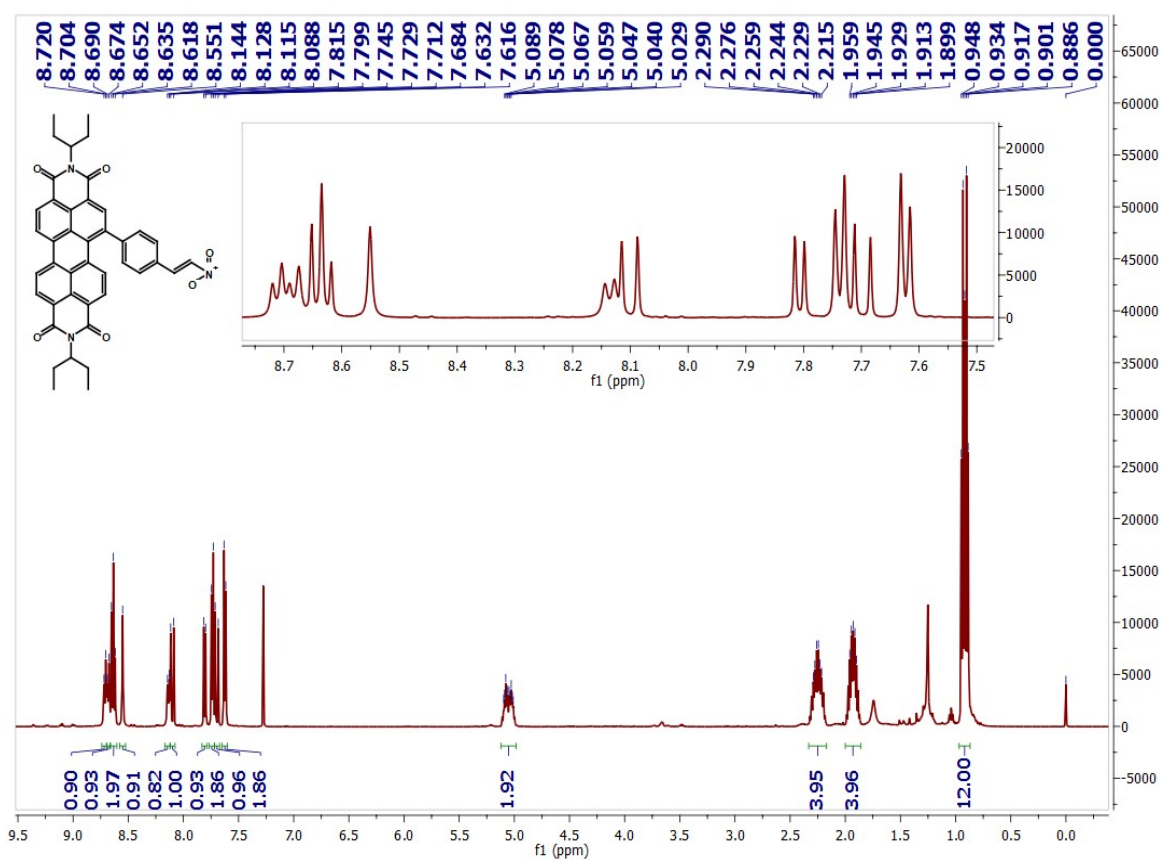

Figure S1. The Proton (<sup>1</sup>H) NMR spectrum for PDI 1.

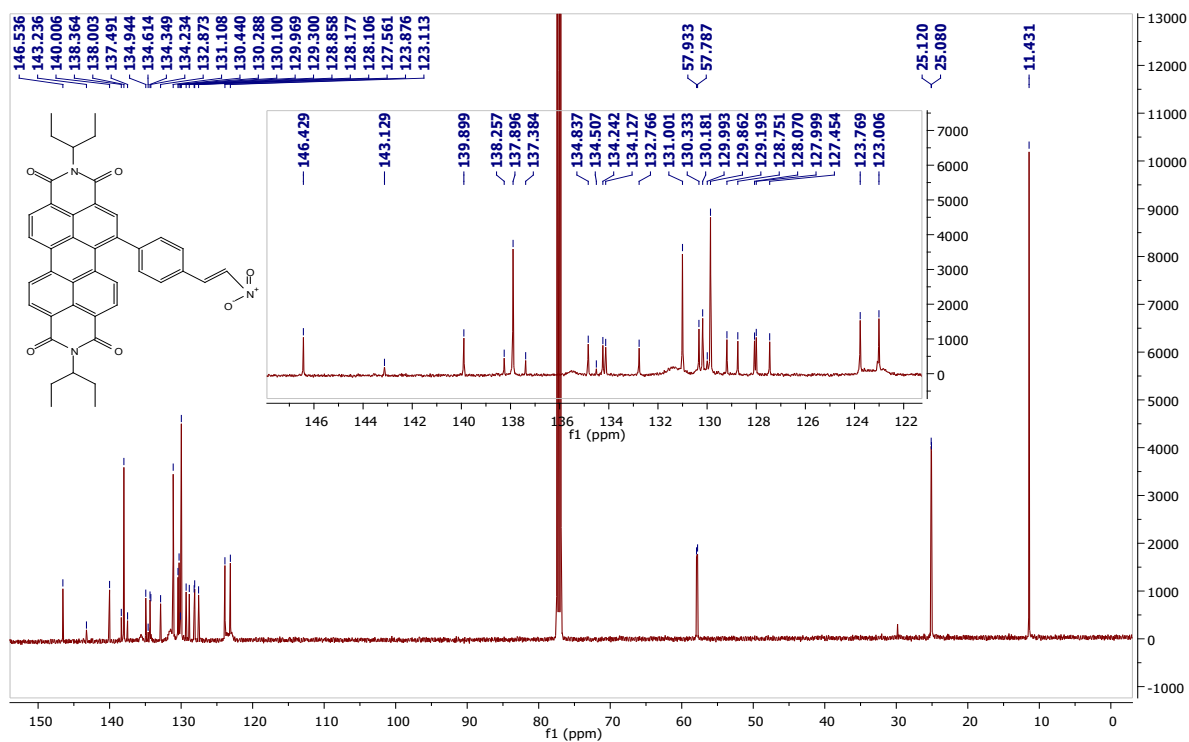

**Figure S2.** The Carbon ( $^{13}\text{C}$ ) NMR spectrum for PDI 1.

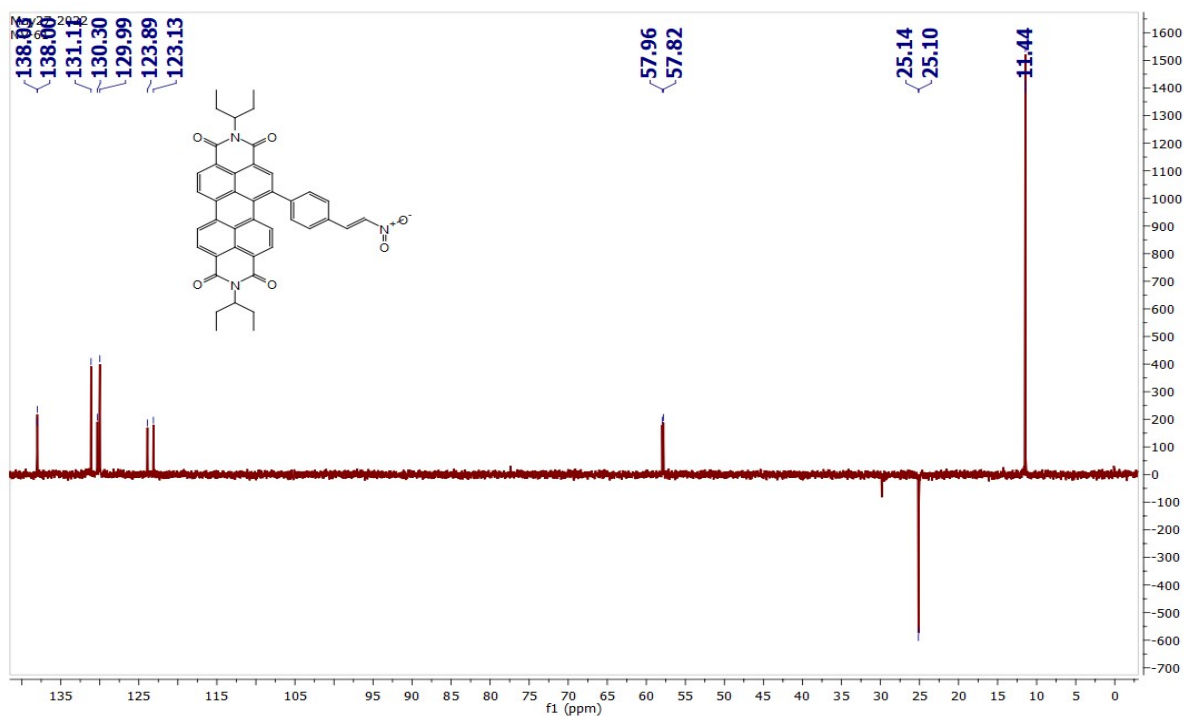

**Figure S3.** The Carbon DEPT-135 NMR spectrum for PDI 1.

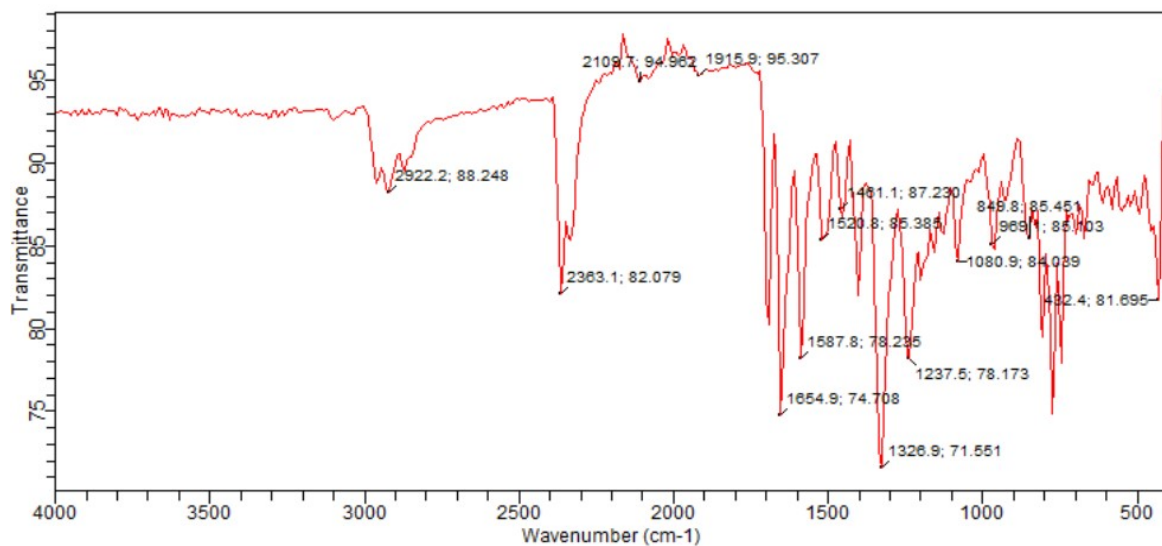

**Figure S4.** FTIR (ATR) spectrum for PDI 1.

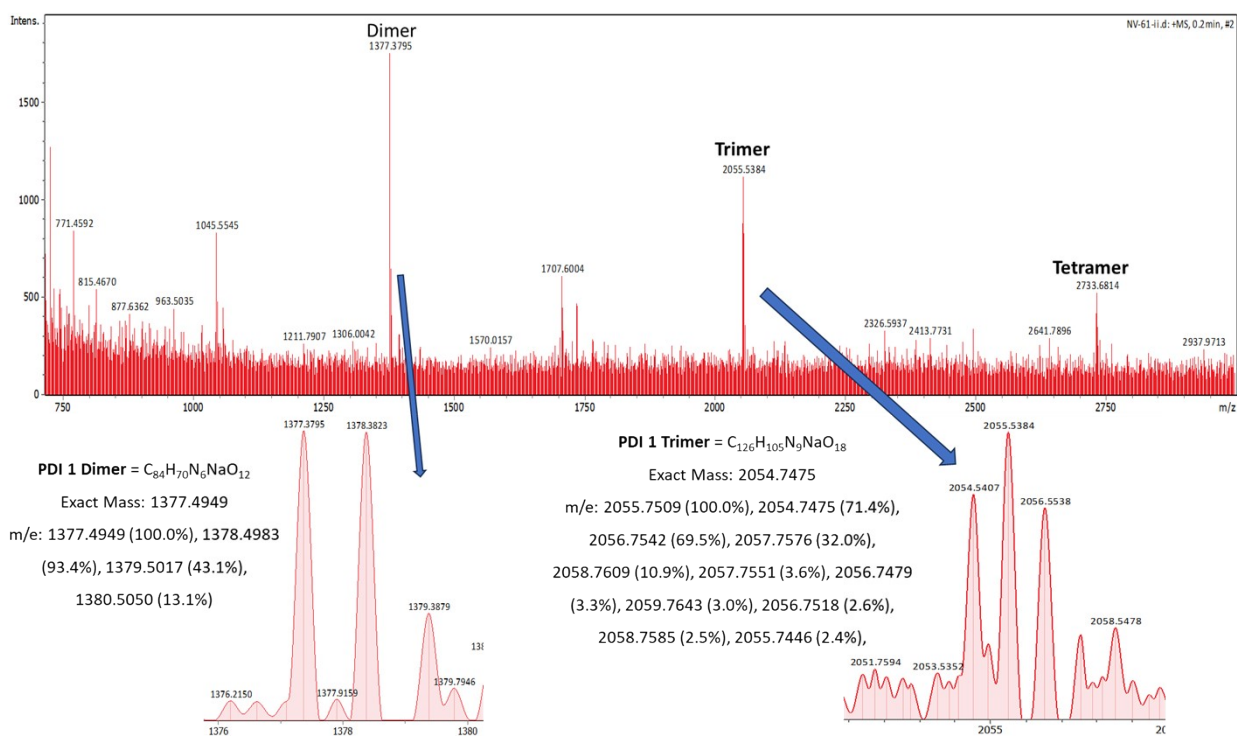

**Figure S5.** Mass spectrum of PDI 1.

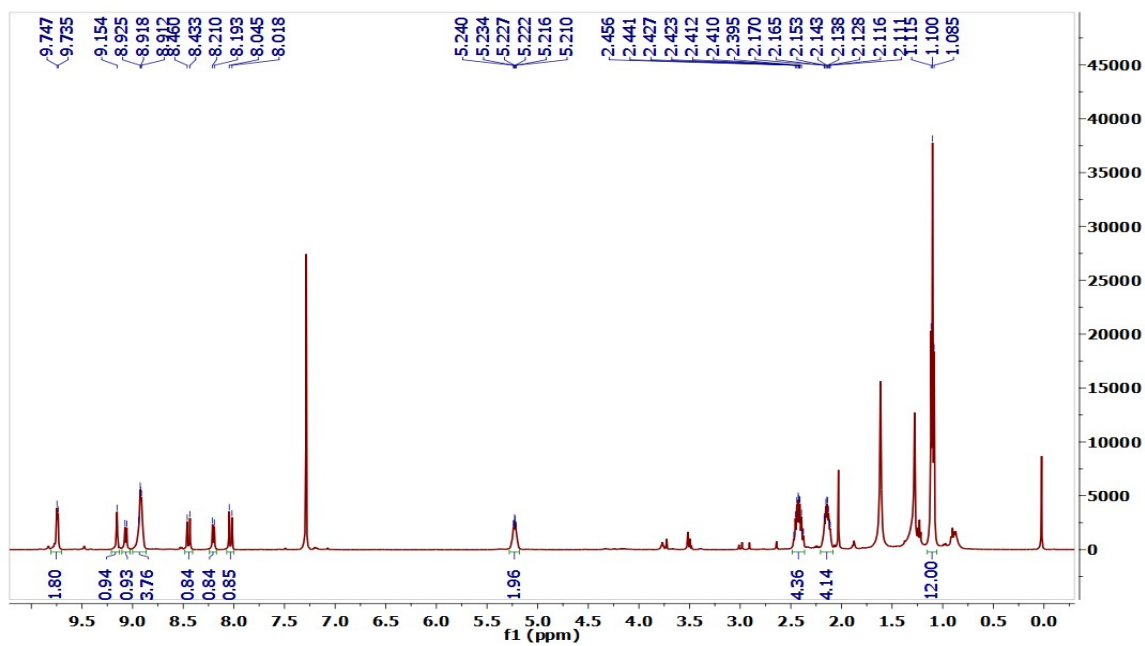

Figure S6. Proton NMR spectrum for CDI 2.

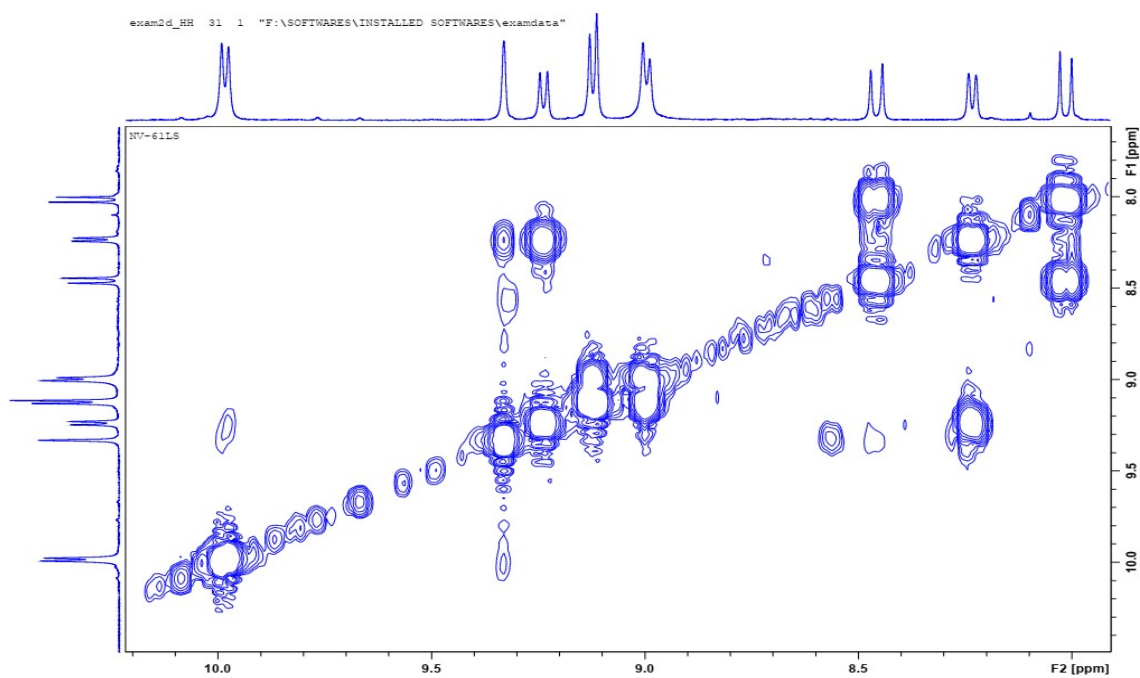

Figure S7. Partial COSY (2D) NMR spectrum for aromatic region of CDI 2.

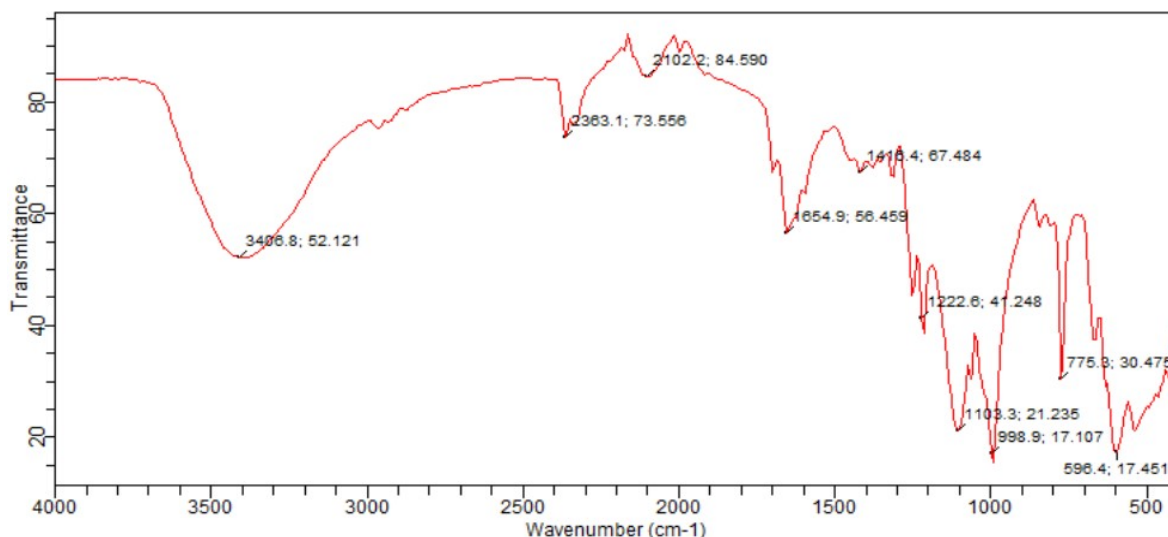

**Figure S8.** FTIR (ATR) spectrum for CDI 2 radical anion.

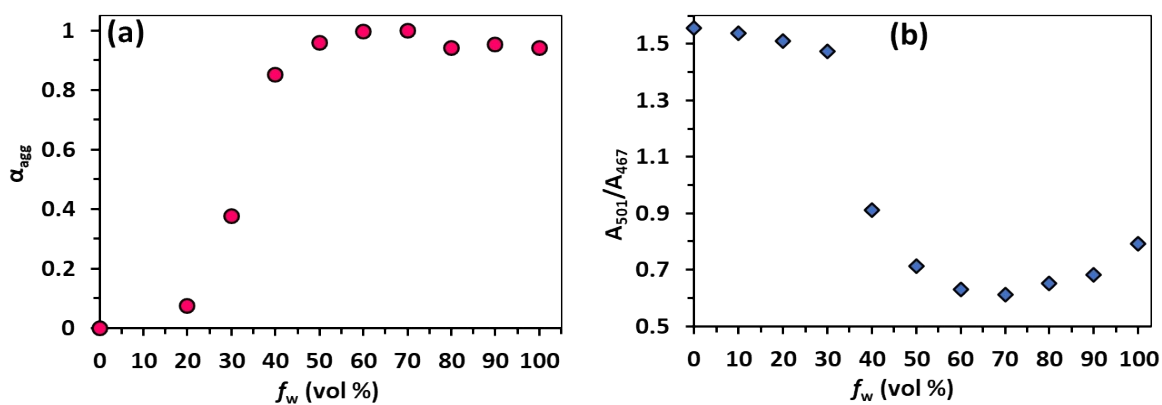

**Figure S9:** (a) The plot of degree of aggregation and (b) Franck–Condon factor against the volume fraction of water added in THF.

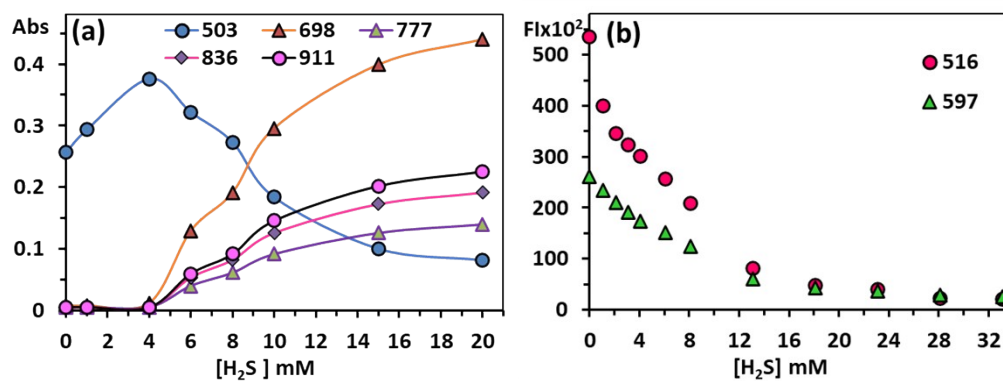

**Figure S10:** (a) Absorbance and (b) emission intensities plot at different wavelengths against concentrations of H<sub>2</sub>S showing the plateau in each titration.

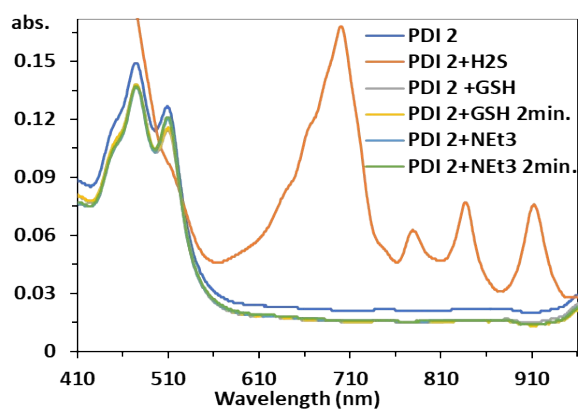

**Figure S11:** The absorbance spectra of CDI 2 upon addition of triethylamine ( $\text{NET}_3$ ) and glutathione (GSH) recorded immediately and after 2 min. of addition. The absorbance spectra for  $\text{H}_2\text{S}$  have also been added for the comparison.

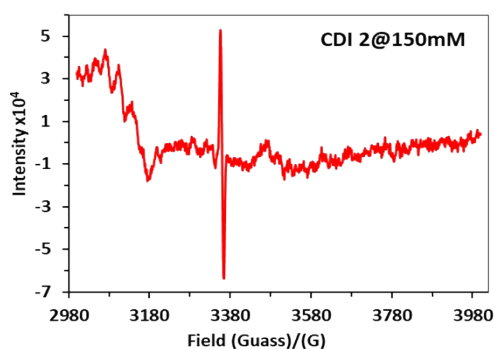

**Figure S12:** The EPR spectrum of neutral CDI 2 (0.1 mM) in the presence of 150 mM concentration of  $\text{H}_2\text{S}$  (full scale spectrum).

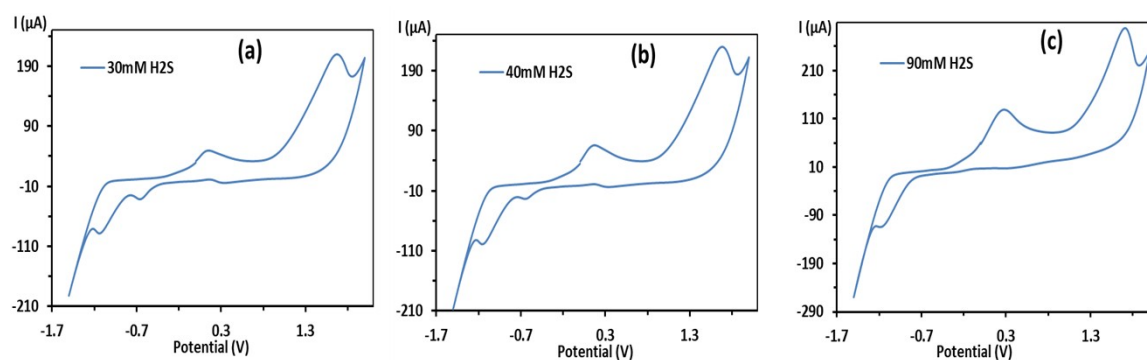

**Figure S13:** Cyclic voltammetry (CV) plots of CDI 2 (0.1 mM) in the presence of different concentrations of  $\text{H}_2\text{S}$ .



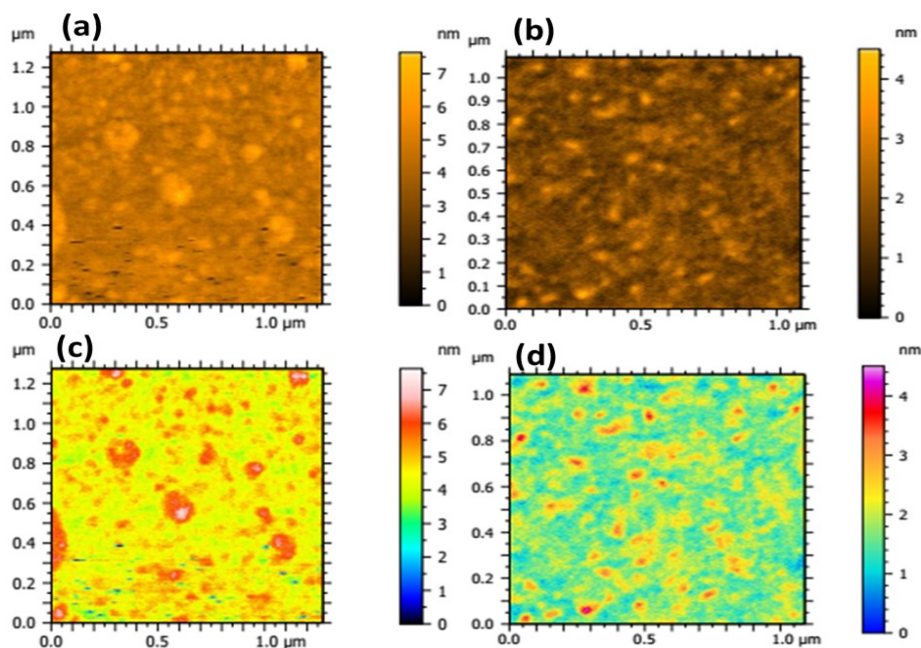

**Figure S14:** The AFM images of neutral CDI 1 (a, c) and CDI 2<sup>-</sup> (b, d) recorded on thin films prepared using 5  $\mu\text{M}$  concentrations in 40% HEPES buffer–THF solution.

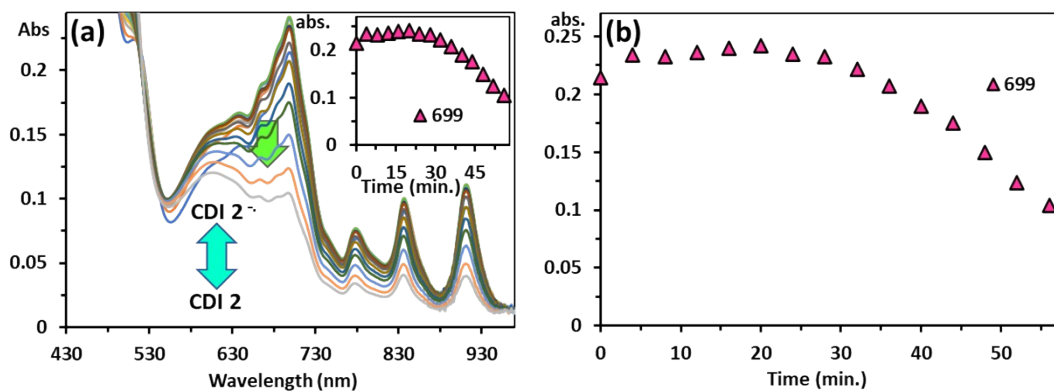

**Figure S15:** (a,b) Plot of CDI 2<sup>-</sup> against time to determine the air stability and its corresponding bar graph.

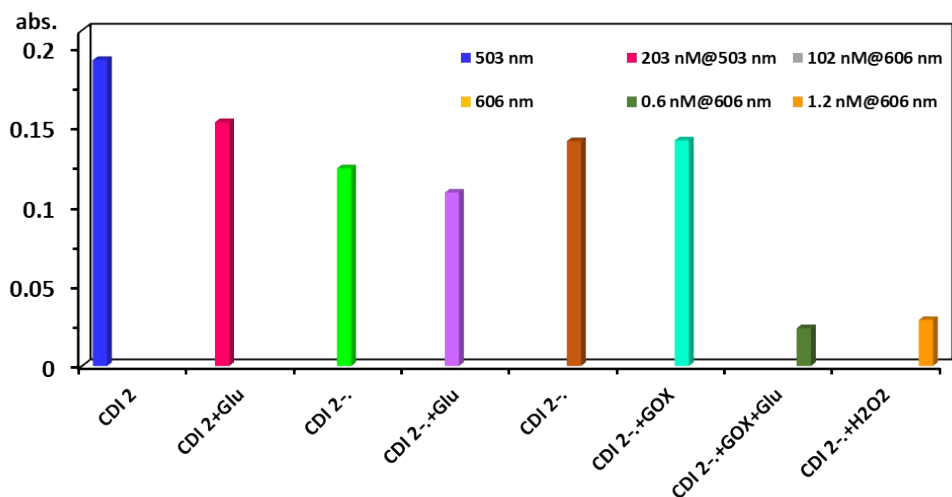

**Figure S16:** Bar graph showing the effect of glucose and GOx on CDI or CDI 2<sup>-</sup> using combination of these.

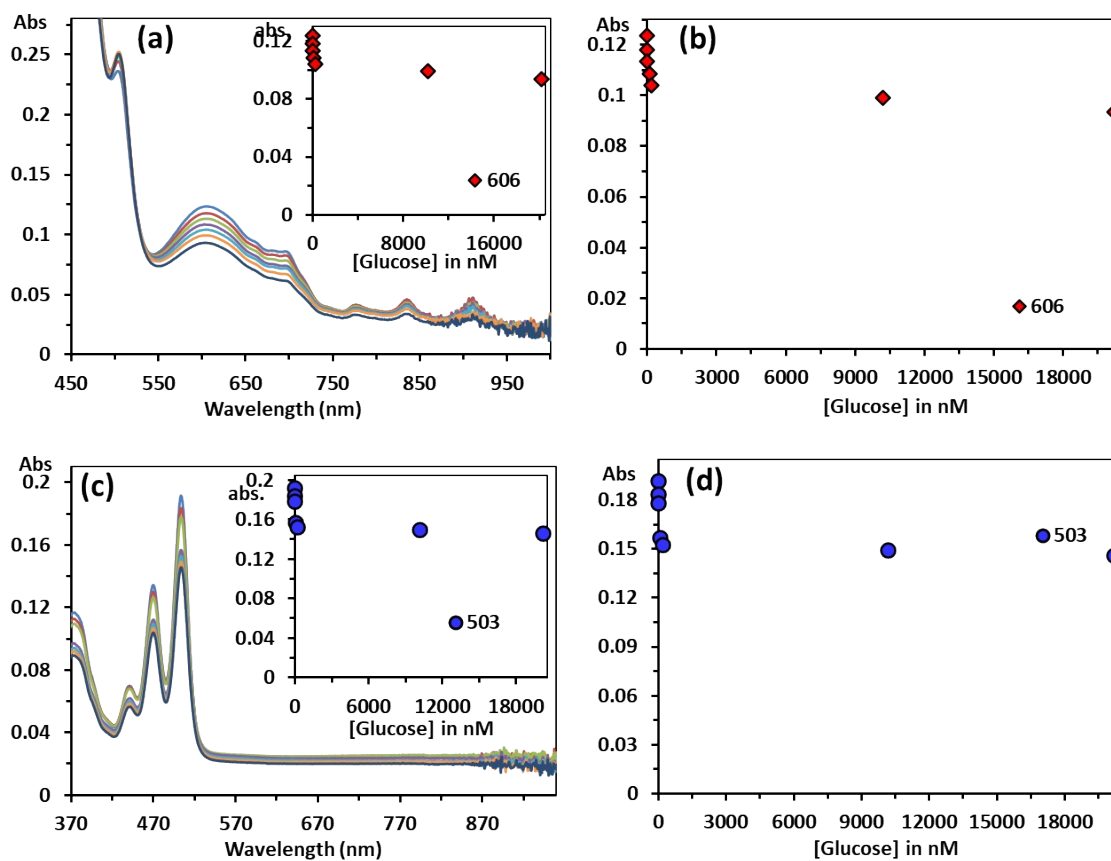

**Figure S17:** Effect of glucose alone on (a,b) CDI 2<sup>-</sup> and (c,d) CDI 2 upon addition of micromolar concentrations of glucose.



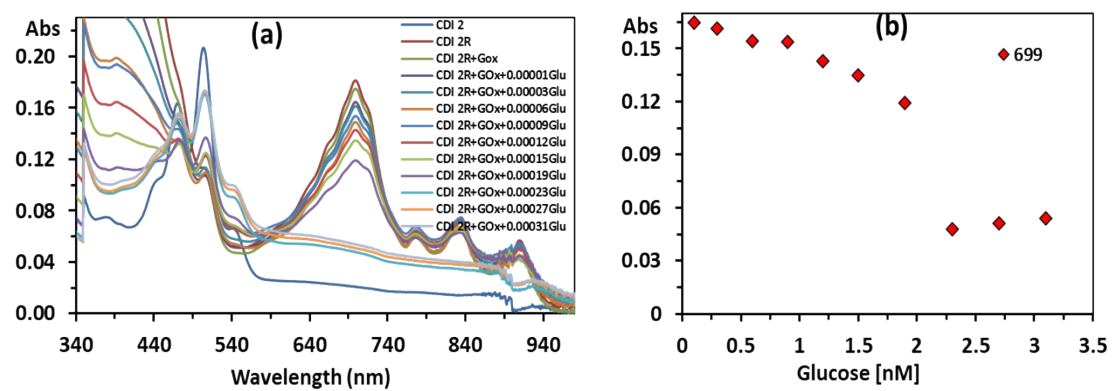

**Figure S18:** (a) Absorbance spectra and (b) absorbance intensity plot of CDI 2<sup>-</sup> upon addition of different concentrations of glucose recorded in 40% HEPES buffer-THF solution containing 10% blood serum.
